# Supplementary material for: Investigation of Clinical Features and Association between Vascular Endothelial Injury Markers and Cytomegalovirus Infection Associated with Thrombotic Microangiopathy in Patients with Anti-Neutrophil Cytoplasmic Antibody (ANCA)-Associated Vasculitis: Case-Based Research
Source: MDPI journal article supplement (doi:10.3390/ijms25020812), 2024-01-09
Supplement: s1 [file s1]

Supplementary Table S3. Main clinical characteristics and three vascular endothelial injury markers in AAV patients who developed CMV viremia and those who did not.

|                                       | Analyzed patients  | CMV viremia (+)     | CMV viremia (-)   | P-value |
|---------------------------------------|--------------------|---------------------|-------------------|---------|
|                                       | (N=25)             | (N=15)              | (N=10)            |         |
| Age                                   | 72 (12)            | 71 (14)             | 75 (7)            | 0.37    |
| Male (n,%)                            | 12 (48.0)          | 7 (46.7)            | 5 (50.0)          | 1.00    |
| Body mass index (kg/m <sup>2</sup> )  | 22.1 (3.3)         | 23.1 (3.4)          | 20.6 (2.8)        | 0.06    |
| Total protein (g/dL)                  | 6.2 (0.8)          | 6.1 (0.8)           | 6.4 (0.8)         | 0.28    |
| Albumin (g/dL)                        | 2.6 (0.6)          | 2.5 (0.6)           | 2.9 (0.7)         | 0.21    |
| eGFR (ml/min/1.73m <sup>2</sup> )     | 10.9 [7.2, 14.7]   | 9.8 [7.7, 12.7]     | 12.9 [7.6, 23.5]  | 0.32    |
| C reactive protein (mg/dL)            | 4.25 [0.54, 8.72]  | 6.10 [0.79, 8.82]   | 1.83 [0.50, 7.04] | 0.44    |
| White blood cell count (/μL)          | 6880 [5810, 11780] | 10670 [7220, 14440] | 5400 [4843, 6590] | 0.006   |
| Hemoglobin (g/dL)                     | 9.3 (1.6)          | 9.5 (1.7)           | 9.0 (1.6)         | 0.52    |
| Platelet count (×10 <sup>4</sup> /μL) | 30.4 (13.8)        | 28.1 (14.6)         | 33.8 (12.4)       | 0.32    |
| Total cholesterol (mg/dL)             | 174 (36)           | 170 (35)            | 179 (38)          | 0.54    |
| Triglyceride (mg/dL)                  | 120 [104, 166]     | 124 [107, 167]      | 114 [99, 139]     | 0.42    |
| Serum sulfatides (nmol/mL)            | 5.32 (2.16)        | 4.94 (2.21)         | 5.89 (2.07)       | 0.29    |
| Lysosulfatides-d18:2<br>(nmol/mL)     | 1.54 (0.75)        | 1.43 (0.73)         | 1.73 (0.79)       | 0.34    |
| Lysosulfatides-d18:1<br>(nmol/mL)     | 3.35 (1.28)        | 3.11 (1.36)         | 3.71 (1.13)       | 0.26    |
| Lysosulfatides-d18:0<br>(nmol/mL)     | 0.07 (0.11)        | 0.09 (0.10)         | 0.04 (0.11)       | 0.35    |
| Lysosulfatides-t18:0<br>(nmol/mL)     | 0.35 (0.21)        | 0.32 (0.22)         | 0.41 (0.19)       | 0.29    |
| sTM (U/mL)                            | 50.1 [39.4, 55.3]  | 54.2 [44.7, 63.8]   | 39.0 [33.2, 45.4] | 0.005   |
| Pentraxin 3 (ng/mL)                   | 28.4 [6.0, 53.2]   | 15.2 [6.3, 55.3]    | 6.8 [6.1, 39.5]   | 0.44    |

Continuous variables exhibiting a normal distribution are presented as means and standard deviations, while those exhibiting a non-normal distribution are presented as medians and interquartile ranges. Categorical variables are presented as numbers (n) and percentages (%). Comparisons of continuous variables between two groups (CMV viremia (+) and (-)) were conducted by Student's t-test or Mann-Whitney U test for variables with a normal or nonnormal distribution, respectively. The comparison of categorical variables was performed using the Chi-squared test. A p-value < 0.05 was considered statistically significant.

AAV; anti-neutrophil cytoplasmic antibody-associated vasculitis, CMV; cytomegalovirus, eGFR; estimated glomerular filtration rate, sTM; soluble thrombomodulin.
