# Supplementary material for: Investigation of Clinical Features and Association between Vascular Endothelial Injury Markers and Cytomegalovirus Infection Associated with Thrombotic Microangiopathy in Patients with Anti-Neutrophil Cytoplasmic Antibody (ANCA)-Associated Vasculitis: Case-Based Research
Source: MDPI journal article supplement (doi:10.3390/ijms25020812), 2024-01-09
Supplement: s1 [file s1]

**Table S2.** Laboratory data at the emergence of TMA

| Complete blood count                                                                            |        | (Reference range) |
|-------------------------------------------------------------------------------------------------|--------|-------------------|
| White blood cells (/mm <sup>3</sup> )                                                           | 51,580 | (3,500–8,000)     |
| Neutrophil (%)                                                                                  | 97     | (38.6–72.3)       |
| Lymphocyte (%)                                                                                  | 2      | (19.6–51.0)       |
| Monocyte (%)                                                                                    | 1      | (2.7–7.9)         |
| Eosinophil (%)                                                                                  | 0      | (0.6–10.1)        |
| Red blood cells ( $\times 10^4/\mu\text{L}$ )                                                   | 327    | (435–555)         |
| Hemoglobin (g/dL)                                                                               | 7.9    | (11.0–14.5)       |
| Platelet ( $\times 10^4/\mu\text{L}$ )                                                          | 1.5    | (13.0–35.0)       |
| Shistocyte                                                                                      | (+)    | (-)               |
| Prothrombin time (sec)                                                                          | 14.5   | (10.0–43.0)       |
| Activated partial thromboplastin time (sec)                                                     | 32.1   | (23.0–38.0)       |
| Fibrinogen (mg/dL)                                                                              | 232.00 | (180.0–350.0)     |
| D-dimer (mg/dL)                                                                                 | 30.1   | (0.0–1.0)         |
| Thrombin-antithrombin III complex ( $\mu\text{g/L}$ )                                           | 5.5    | (<3.0)            |
| Antithrombin III (%)                                                                            | 71.9   | (80.0–120.0)      |
| Disseminated intravascular coagulation score on Japanese diagnostic criteria                    | 5      | (0–6)             |
| Serum chemistry                                                                                 |        |                   |
| Total protein (g/dL)                                                                            | 4.4    | (6.7–8.3)         |
| Albumin (g/dL)                                                                                  | 1.6    | (3.8–5.3)         |
| Urea nitrogen (mg/dL)                                                                           | 105    | (8.0–22.0)        |
| Creatinine (mg/dL)                                                                              | 3.36   | (0.40–0.80)       |
| Uric acid (mg/dL)                                                                               | 9.7    | (2.6–7.0)         |
| Aspartate aminotransferase (IU/L)                                                               | 22     | (10–30)           |
| Alanine aminotransferase (IU/L)                                                                 | 7      | (5–40)            |
| Lactate dehydrogenase (IU/L)                                                                    | 446    | (110–220)         |
| Sodium (mEq/L)                                                                                  | 137    | (135–147)         |
| Potassium (mEq/L)                                                                               | 4.5    | (3.5–5.0)         |
| Chloride (mEq/L)                                                                                | 104    | (98–108)          |
| C-reactive protein (mg/dL)                                                                      | 3.2    | (<0.1)            |
| Haptoglobin (mg/dL)                                                                             | <5     | (25–176)          |
| Myeloperoxidase-antineutrophil cytoplasmic antibody (IU/mL)                                     | 71.6   | (0.0–3.5)         |
| A disintegrin-like and metalloproteinase with thrombospondin type 1 motif 13 activity (%)       | 19.5   | (>10.0)           |
| A disintegrin-like and metalloproteinase with thrombospondin type 1 motif 13 antibodies (IU/mL) | 0.0    | (<0.5)            |
| Direct coombs                                                                                   | (-)    | (-)               |
| Indirect coombs                                                                                 | (-)    | (-)               |
| Heparin-induced thrombocytopenia antibody (IU/mL)                                               | 0.6    | (0.0–0.9)         |
| Cryoglobulin                                                                                    | (-)    | (-)               |
| Anti-cardiolipin immunoglobulin G antibody (IU/mL)                                              | 1.0    | (<12.3)           |
| Anti-beta2-glycoprotein 1 antibody (IU/mL)                                                      | <1.2   | (<3.5)            |
