# Supplementary material for: Investigation of Clinical Features and Association between Vascular Endothelial Injury Markers and Cytomegalovirus Infection Associated with Thrombotic Microangiopathy in Patients with Anti-Neutrophil Cytoplasmic Antibody (ANCA)-Associated Vasculitis: Case-Based Research
Source: MDPI journal article supplement (doi:10.3390/ijms25020812), 2024-01-09
Supplement: s1 [file s1]

**Table S1.** Laboratory data at the admission

| Urinalysis                                                  |        | (Reference range) |
|-------------------------------------------------------------|--------|-------------------|
| Proteinuria                                                 | 3+     | (-)               |
| Hematuria                                                   | 3+     | (-)               |
| Red blood cells (/HPF)                                      | 100>   | (-)               |
| Red blood cell casts (/WF)                                  | 50-99  | (-)               |
| Protein/Creatinine ratio (g/gCr)                            | 3.42   | (<0.3)            |
| Complete blood count                                        |        |                   |
| White blood cells (/mm <sup>2</sup> )                       | 48,280 | (3,500–8,000)     |
| Neutrophil (%)                                              | 97     | (38.6–72.3)       |
| Lymphocyte (%)                                              | 3      | (19.6–51.0)       |
| Monocyte (%)                                                | 0      | (2.7–7.9)         |
| Eosinophil (%)                                              | 0      | (0.6–10.1)        |
| Red blood cells (×10 <sup>4</sup> /μL)                      | 288    | (435–555)         |
| Hemoglobin (g/dL)                                           | 6.8    | (11.0–14.5)       |
| Platelet (×10 <sup>4</sup> /μL)                             | 30.3   | (13.0–35.0)       |
| Prothrombin time (sec)                                      | 14.3   | (10.0–43.0)       |
| Activated partial thromboplastin time (sec)                 | 29.0   | (23.0–38.0)       |
| Fibrinogen (mg/dL)                                          | 675.0  | (180.0–350.0)     |
| D-dimer (mg/dL)                                             | 36.4   | (0.0–1.0)         |
| Soluble thrombomodulin (IU/mL)                              | 44.1   | (<7.0)            |
| Pentraxin 3 (ng/mL)                                         | 55.3   | (0.73–5.49)       |
| Serum chemistry                                             |        |                   |
| Total protein (g/dL)                                        | 5.7    | (6.7–8.3)         |
| Albumin (g/dL)                                              | 1.1    | (3.8–5.3)         |
| Urea nitrogen (mg/dL)                                       | 78.0   | (8.0–22.0)        |
| Creatinine (mg/dL)                                          | 3.59   | (0.40–0.80)       |
| Uric acid (mg/dL)                                           | 9.8    | (2.6–7.0)         |
| Total cholesterol (mg/dL)                                   | 104    | (142–219)         |
| Aspartate aminotransferase (IU/L)                           | 13     | (10–30)           |
| Alanine aminotransferase (IU/L)                             | 5      | (5–40)            |
| Lactate dehydrogenase (IU/L)                                | 266    | (110–220)         |
| Sodium (mEq/L)                                              | 139    | (135–147)         |
| Potassium (mEq/L)                                           | 3.8    | (3.5–5.0)         |
| Chloride (mEq/L)                                            | 107    | (98–108)          |
| Calcium (mEq/L)                                             | 6.8    | (8.5–10.2)        |
| Phosphorus (mEq/L)                                          | 7.1    | (2.5–4.5)         |
| Glucose (mg/dL)                                             | 75     | (75–110)          |
| Hemoglobin A1c (%)                                          | 5.4    | (4.6–6.2)         |
| C-reactive protein (mg/dL)                                  | 25.2   | (<0.1)            |
| Immunoglobulin G (mg/dL)                                    | 2187   | (861–1747)        |
| Immunoglobulin A (mg/dL)                                    | 367    | (93–393)          |
| Immunoglobulin M (mg/dL)                                    | 128    | (33–183)          |
| Complement 3 (mg/dL)                                        | 90.0   | (70–150)          |
| Complement 4 (mg/dL)                                        | 20.3   | (14–40)           |
| 50% hemolytic complement activity (IU/mL)                   | 47.5   | (30–50)           |
| Antinuclear antibody                                        | 1280   | (-)               |
| Anti-double-stranded deoxyribonucleic acid antibody (IU/mL) | 9.5    | (0.0–12.0)        |
| Anti SSA antibody                                           | (-)    | (-)               |
| Anti-SSB antibody                                           | (-)    | (-)               |
| Anti Smith antibody (IU/mL)                                 | 0.1    | (<10.0)           |
| Myeloperoxidase-antineutrophil cytoplasmic antibody (IU/mL) | 71.6   | (0.0–3.5)         |
| Protease3- antineutrophil cytoplasmic antibody (IU/mL)      | <1.0   | (0.0–3.5)         |
| Anti-glomerular basement membrane antibody (IU/mL)          | <1.0   | (<3.0)            |
| Hepatitis B virus surface antigen (IU/mL)                   | 0.001  | (0.00–0.004)      |
| Hepatitis C virus antibody (IU/mL)                          | 0.1    | (0.0–0.9)         |
| Human immunodeficiency virus antibody (IU/mL)               | 0.1    | (0.0–0.9)         |
| Cytomegalovirus immunoglobulin G antibody (AU/mL)           | 202.0  | (0.0–15.0)        |
