# Supplementary material for: Investigation of Clinical Features and Association between Vascular Endothelial Injury Markers and Cytomegalovirus Infection Associated with Thrombotic Microangiopathy in Patients with Anti-Neutrophil Cytoplasmic Antibody (ANCA)-Associated Vasculitis: Case-Based Research
Source: Int J Mol Sci. 2024 Jan 9;25(2):812. doi: 10.3390/ijms25020812 (PMC10815804; doi:10.3390/ijms25020812)
Supplement: Supplementary file 1 [file ijms-25-00812-s001.zip]

Archive with 4 entries (4 files):
- Supple_figS1_TMA_AAV_positive control.pptx
- Supple_TableS1_TMA_AAV_v0.1_20231204.pdf
- Supple_TableS2_TMA_AAV_v0.2_20231226.pdf
- Supple_TableS3_CMV_test25case_v0.1_20231121.pdf
